# Supplementary material for: Fine Tuning of the Mechanical Properties of Bio-Based PHB/Nanofibrillated Cellulose Biocomposites to Prevent Implant Failure Due to the Bone/Implant Stress Shielding Effect
Source: MDPI journal article supplement (doi:10.3390/polym15061438), 2023-03-14
Supplement: s1 [file s1]

## **SUPPORTING INFORMATION**

### **Fine Tuning of the Mechanical Properties of Bio-Based PHB/Nanofibrillated Cellulose Biocomposites to Prevent Implant Failure Due to the Bone/Implant Stress Shielding Effect**

Martina Ferri <sup>1,2</sup>, Emanuele Maria Santos Chiromito <sup>3</sup>, Antonio Jose Felix Carvalho <sup>3</sup>, Davide Morselli <sup>1,2</sup>,  
Micaela Degli Esposti <sup>1,2,\*</sup>, Paola Fabbri <sup>1,2,\*</sup>

<sup>1</sup> *Department of Civil, Chemical, Environmental and Materials Engineering, Università di Bologna, Via Terracini 28, 40131 Bologna, Italy*

<sup>2</sup> *National Interuniversity Consortium of Materials Science and Technology (INSTM), Via Giusti 9, 50121 Firenze, Italy*

<sup>3</sup> *Department of Materials Engineering, Engineering School of São Carlos, University of São Paulo, Av. João Dagnone, 1100; 13563-120, São Carlos, SP, Brazil*

\* Corresponding Authors

Paola Fabbri

t: +39 051 2090364

p.fabbri@unibo.it

Micaela Degli Esposti

t: +39 051 2090363

micaela.degliesti@unibo.it

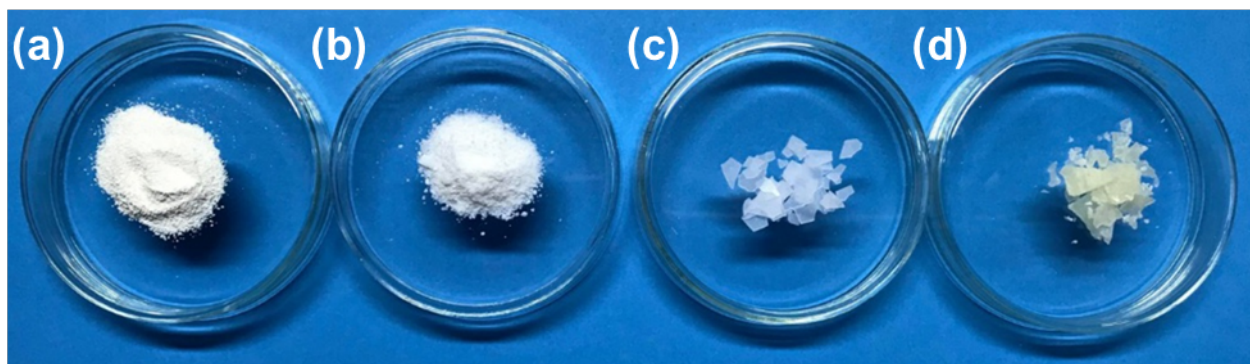

**Figure S1.** Representative photographs of (a) PHB as received, (b) purified PHB, (c) mPEG 1900 and (d) synthesized PHB-block-mPEG copolymer.

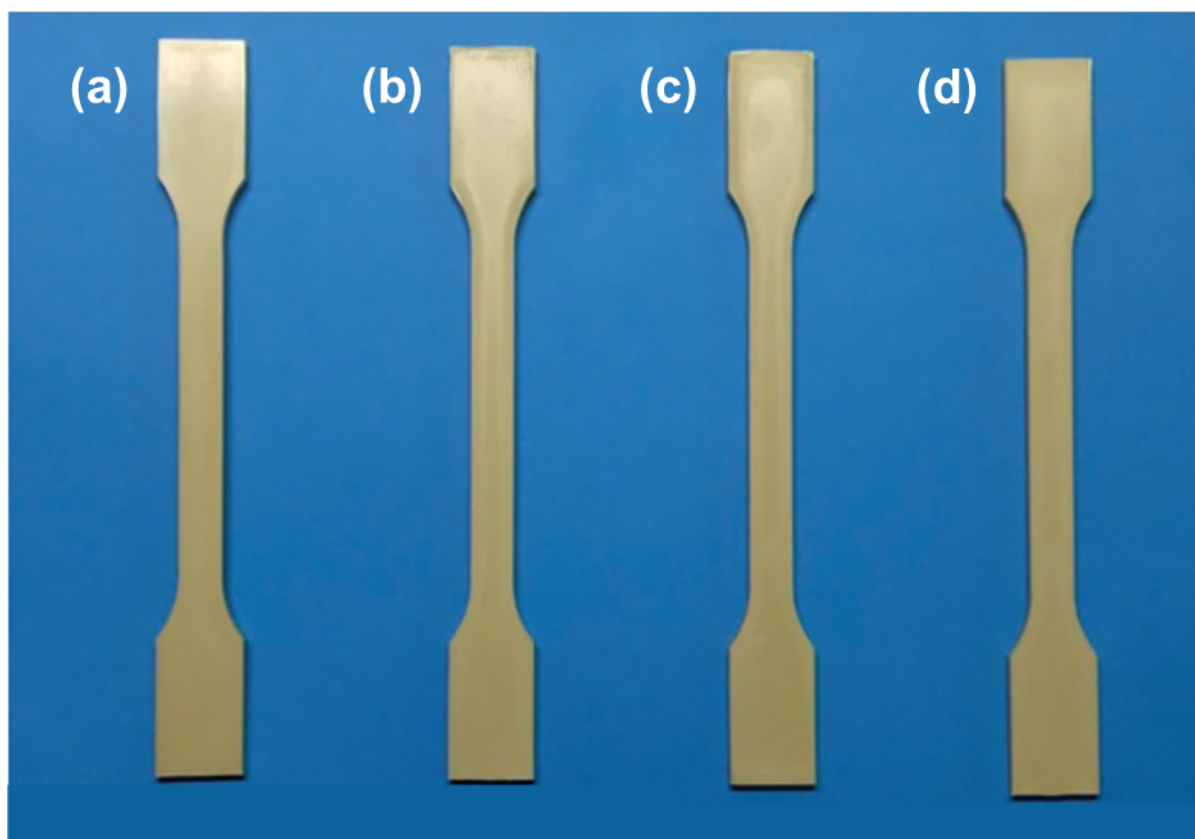

**Figure S2.** Representative photographs of dog-bone specimens of (a) PHB, (b) PHB/PEG, (c) PHB/PEG/0.5%NFC, and (d) PHB/PEG/1%NFC.

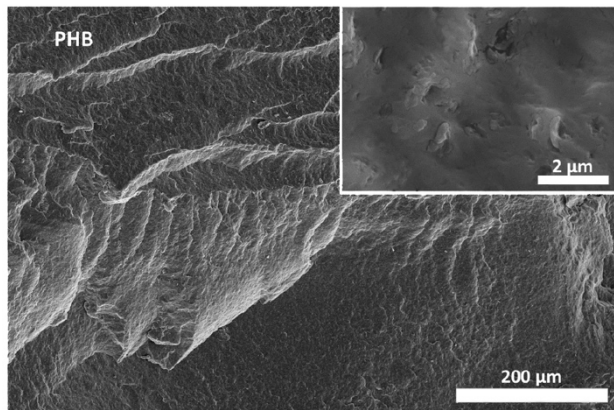

**Figure S3.** FESEM micrograph (secondary electrons) of the neat PHB cross section. The inclusions detected in the higher magnification inset can be attributed to cellular residues derived from biological PHB production.

### Composition of the copolymer blocks

Calculation of the copolymer blocks composition according to Ravenelle and Marchessault [1]. In blue the calculations related to this work and in particular to the  $^1\text{H}$ -NMR spectrum (Figure 1d of the main paper) are reported.

Hypothesizing that only diblock copolymer chains are present in the synthesized copolymer, the molar fraction of PHB ( $n_{\text{PHB}}$ ) can be calculated as follows:

$$n_{\text{PHB}} = \frac{N_{\text{PHB}}}{N_{\text{PHB}} + N_{\text{mPEG}}}$$

where  $N_x$  is the average number of repeating units of each segment derived from the normalized  $^1\text{H}$ -NMR spectrum as:

$$N_{\text{PHB}} = \frac{I_{5.3\text{ppm}} + I_{2.5\text{ppm}} + I_{1.3\text{ppm}}}{12}$$

$$N_{\text{PHB}} = \frac{2.00 + 4.36 + 6.34}{12} = 1.06$$

$$N_{\text{mPEG}} = \frac{I_{3.4-3.8\text{ppm}}}{8}$$

$$N_{\text{mPEG}} = \frac{1.74}{8} = 0.22$$

where  $I_x$  is the integration value of the peaks and/or regions corresponding to the backbone of each polymer.

By substituting the calculated  $N_{\text{PHB}}$  and  $N_{\text{mPEG}}$  values, the molar fraction of PHB ( $n_{\text{PHB}}$ ) results:

$$n_{\text{PHB}} = \frac{1.06}{1.06 + 0.22} = 0.83$$

By considering the formula  $-(\text{HB})_x-(\text{EG})_y-$  for the diblock copolymer, it is possible to calculate the corresponding PHB weight fraction:

$$n_{\text{PHB}} = \frac{x}{x + y}$$

where  $y = 1900/44$  for mPEG (1900 g mol<sup>-1</sup> is the mPEG molecular weight and 44 g mol<sup>-1</sup> is the molecular weight of its monomeric unit). Hence:

$$x = \frac{n_{\text{PHB}} * y}{1 - n_{\text{PHB}}}$$

$$x = \frac{0.83 * 43.18}{1 - 0.83} = 210.82$$

Since 86 g mol<sup>-1</sup> is the molecular weight of the monomeric unit of PHB, it is possible to calculate the weight percentage of the PHB block (wt.%<sub>PHB</sub>) as follows:

$$\text{wt.\%}_{\text{PHB}} = \frac{86 * x}{(86 * x) + 1900} * 100$$

$$\text{wt.\%}_{\text{PHB}} = \frac{86 * 210.82}{(86 * 210.82) + 1900} * 100 = 90.5$$

**Table S1.** Tensile and flexural mechanical properties of the prepared materials expressed as mean value and related standard deviation.

| Sample              | Tensile properties                                  |                                |                                      | Flexural properties                                  |                                 |                                             |
|---------------------|-----------------------------------------------------|--------------------------------|--------------------------------------|------------------------------------------------------|---------------------------------|---------------------------------------------|
|                     | Young's Modulus (cord 0.05-0.25 $\epsilon\%$ ; GPa) | Maximum tensile strength (MPa) | Elongation at break ( $\epsilon\%$ ) | Flexural Modulus (cord 0.05-0.25 $\epsilon\%$ ; GPa) | Maximum flexural strength (MPa) | Elongation at maximum flexural strength (%) |
| PHB neat            | 2.62 $\pm$ 0.06                                     | 27.9 $\pm$ 0.1                 | 2.6 $\pm$ 0.1                        | 2.36 $\pm$ 0.10                                      | 51.8 $\pm$ 0.8                  | 3.6 $\pm$ 0.2                               |
| PHB/PEG             | 2.08 $\pm$ 0.04                                     | 22.1 $\pm$ 0.1                 | 3.6 $\pm$ 0.1                        | 1.67 $\pm$ 0.10                                      | 22.1 $\pm$ 0.1                  | 3.6 $\pm$ 0.1                               |
| PHB/PEG/0.5%NFC     | 2.20 $\pm$ 0.07                                     | 23.1 $\pm$ 0.1                 | 3.8 $\pm$ 0.1                        | 1.71 $\pm$ 0.12                                      | 23.1 $\pm$ 0.1                  | 3.8 $\pm$ 0.1                               |
| PHB/PEG/1%NFC       | 2.10 $\pm$ 0.06                                     | 23.7 $\pm$ 0.2                 | 3.8 $\pm$ 0.2                        | 1.69 $\pm$ 0.26                                      | 23.7 $\pm$ 0.2                  | 3.8 $\pm$ 0.2                               |
| PHB/PEG/COP         | 1.70 $\pm$ 0.02                                     | 19.6 $\pm$ 0.5                 | 4.1 $\pm$ 0.2                        | 1.60 $\pm$ 0.20                                      | 32.7 $\pm$ 0.6                  | 4.9 $\pm$ 0.1                               |
| PHB/PEG/COP/0.5%NFC | 1.88 $\pm$ 0.04                                     | 21.0 $\pm$ 0.5                 | 3.9 $\pm$ 0.2                        | 1.73 $\pm$ 0.10                                      | 34.9 $\pm$ 0.8                  | 4.3 $\pm$ 0.6                               |
| PHB/PEG/COP/1%NFC   | 1.98 $\pm$ 0.08                                     | 21.7 $\pm$ 0.3                 | 3.6 $\pm$ 0.4                        | 1.84 $\pm$ 0.16                                      | 33.7 $\pm$ 0.3                  | 4.1 $\pm$ 0.2                               |

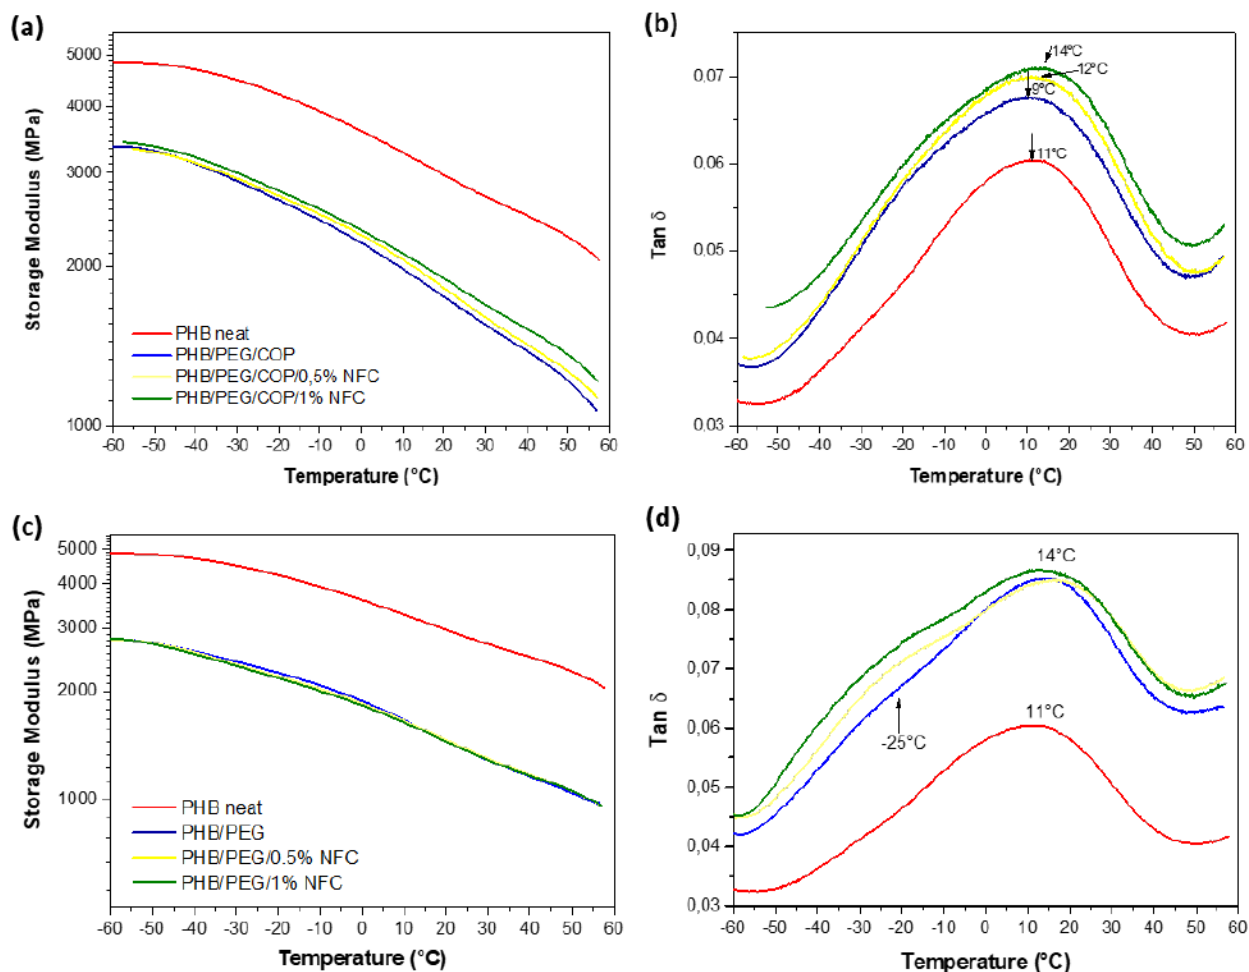

**Figure S4.** (a) Storage modulus ( $E'$ ) and (b) dissipation factor ( $\text{Tan } \delta$ ) with  $T_g$  values of PHB/PEG/COP/NFC composites. (c) Storage modulus ( $E'$ ) and (d) dissipation factor ( $\text{Tan } \delta$ ) with  $T_g$  values of PHB/PEG/NFC composites.

### Thermogravimetric analysis experimental details

Thermogravimetric analysis (TGA) was performed on a Perkin Elmer Thermogravimetric Analyzer TGA7. Approx. 10 mg of each sample were heated up to 500 $^{\circ}\text{C}$  using a heating rate of 5 $^{\circ}\text{C}\cdot\text{min}^{-1}$  under nitrogen flow. TGA curves were analyzed by Pyris software.

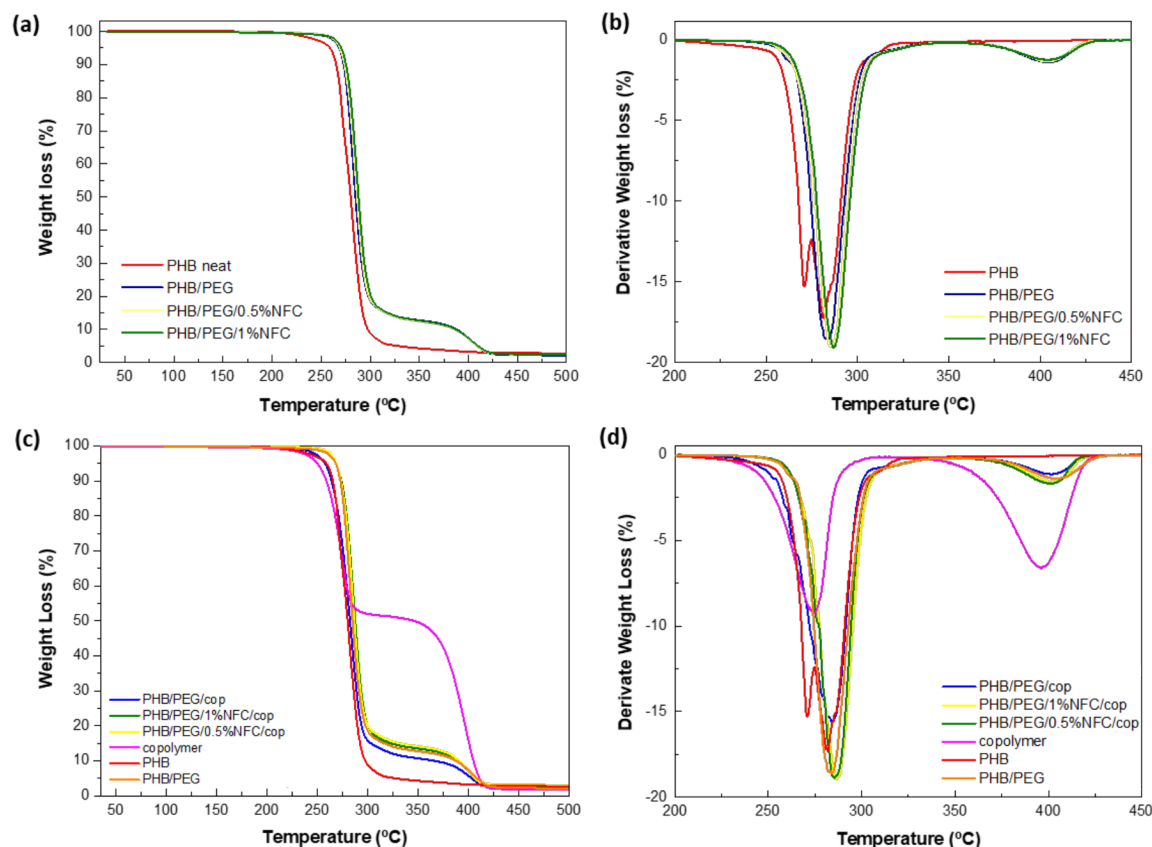

**Figure S5.** Thermogravimetric analysis curves of (a) TGA and (b) DTGA of PHB, PHB/PEG, and PHB/PEG/NFC composites. Thermogravimetric analysis curves of (c) TGA and (d) DTGA of PHB, copolymer, PHB/PEG, and PHB/PEG/NFC/COP composites. TGA curves were recorded between 25 and 500°C. DTGA highlight the most significant weight loss between 200 and 450°C.

## References

1. Ravenelle, F.; Marchessault, R.H. One-Step Synthesis of Amphiphilic Diblock Copolymers from Bacterial Poly([R]-3-Hydroxybutyric Acid). *Biomacromolecules* **2002**, *3*, 1057–1064, doi:10.1021/bm025553b.
